# Supplementary material for: Knitted Pneumatic Actuators for Soft Robotics: Influence of Material and Geometric Parameters
Source: Research Square preprint supplement (doi:10.21203/rs.3.rs-7363924/v1), 2025-09-18
Supplement: Supplementary file 1 [file 22c21544c0c9a843d9e7551f.xlsx]

## Sheet: Specs- Influence Geometric Prop
	1. Altering the 'Length' of the sample
	Sample Code	SA1a			SA1b			SA1c			SA1d
	Top Layer	Acrylic			Acrylic			Acrylic			Acrylic
	Bottom Layer	Nylon Low Melt			Nylon Low Melt			Nylon Low Melt			Nylon Low Melt
	Course Ratio	3:1			3:1			3:1			3:1
	Parameter	After Knitting	After Heating	% diff	After Knitting	After Heating	% diff	After Knitting	After Heating	% diff	After Knitting	After Heating	% diff
	Length (cm)	23	13.8	-0.4	26	16.5	-0.365385	29	17.8	-0.386207	32	18.5	-0.421875
	Width (cm)	3.2	2.46667	-0.229167	3.2	2.33333	-0.270833	3.2	2.46667	-0.229167	3.2	2.36667	-0.260417
	2. Altering the 'Width' of the sample
	Sample Code	SA2
	Top Layer	Acrylic
	Bottom Layer	Nylon Low Melt
	Course Ratio	3:1
	Parameter	After Knitting	After Heating	% diff
	Length (cm)	23	13.2667	-0.423188
	Width (cm)	2.2	1.83333	-0.166667
	3. Altering the 'Course Ratio' of the sample
	Sample Code	SA4a			SA4b			SA4c
	Top Layer	Acrylic			Polyester punched lycra yarn			Acrylic
	Bottom Layer	Nylon Low Melt			Nylon Low Melt			Nylon Low Melt
	Course Ratio	3:1			2:1			1:1
	Parameter	After Knitting	After Heating	% diff	After Knitting	After Heating	% diff	After Knitting	After Heating	% diff
	Length of sample (cm)	23	12.2	-0.469565	23	13.9	-0.395652	23	13.0667	-0.431884
	Width of sample (cm)	2.2	1.8	-0.181818	2.2	1.8	-0.181818	2.2	1.76667	-0.19697

## Sheet: BA - SA1 - Graphs
	Average Pressure (Kpa) SA1
									3								3								3
	SA1a(i) Pressure (kPa)	SA1a(i) Bend angle (˚)	SA1a(ii) Pressure (kPa)	SA1a(ii) Bend angle (˚)	SA1a(iii) Pressure (kPa)	SA1a(iii) Bend angle (˚)	Avg SA1a Pressure (kPa)	Avg SA1a Bend angle (˚)	SA1b(i) Pressure (kPa)	SA1b(i) Bend angle (˚)	SA1b(ii) Pressure (kPa)	SA1b(ii) Bend angle (˚)	SA1b(iii) Pressure (kPa)	SA1b(iii) Bend angle (˚)	Avg SA1b Pressure (kPa)	Avg SA1b Bend angle (˚)	SA1c(i) Pressure (kPa)	SA1c(i) Bend angle (˚)	SA1c(ii) Pressure (kPa)	SA1c(ii) Bend angle (˚)	SA1c(iii) Pressure (kPa)	SA1c(iii) Bend angle (˚)	Avg SA1c Pressure (kPa)	Avg SA1c Bend angle (˚)	SA1d (i) Pressure (kPa)	SA1d (i) Bend angle (˚)	SA1d (ii) Pressure (kPa)	SA1d (ii) Bend angle (˚)	SA1d (iii) Pressure (kPa)	SA1d (iii) Bend angle (˚)	Avg SA1d Pressure (kPa)	Avg SA1d Bend angle (˚)
	6	0	10	0	8	0	8	0	16	0	12	0	12	0	13.3333	0	12	0	16	0	14	0	14	0	17	0	10	0	14	0	13.6667	0
	18	10	12	10	13	20	14.3333	13.3333	19	10	14	10	14	10	15.6667	10	15	15	18	10	18	20	17	15	20	10	14	10	18	10	17.3333	10
	20	25	14	20	16	40	16.6667	28.3333	21	25	17	25	18	25	18.6667	25	17	20	22	30	21	40	20	30	22	20	18	20	20	20	20	20
	22	45	20	50	18	65	20	53.3333	23	35	19	40	20	40	20.6667	38.3333	20	30	24	40	23	50	22.3333	40	25	50	21	30	24	40	23.3333	40
	24	55	21	60	20	75	21.6667	63.3333	26	60	21	50	22	55	23	55	24	45	26	55	24	65	24.6667	55	26	60	24	40	26	60	25.3333	53.3333
	27	120	23	80	24	95	24.6667	98.3333	27	75	24	65	24	65	25	68.3333	26	65	27	70	26	80	26.3333	71.6667	27	80	26	60	27	75	26.6667	71.6667
	29	140	25	90	28	135	27.3333	121.667	28	100	27	80	26	80	27	86.6667	28	105	28	95	28	110	28	103.333	28	110	28	100	28	105	28	105
	30	160	30	140	30	160	30	153.333	30	140	28	120	28	120	28.6667	126.667	30	135	30	140	29	125	29.6667	133.333	30	135	30	140	30	140	30	138.333
	32	170	32	160	32	170	32	166.667	32	160	30	160	30	160	32	160	32	160	32	160	32	160	32	160	32	160	32	160	32	160	32	160

## Sheet: BA - SA2 - Graphs
	Average Pressure (Kpa) SA2
									3								3								3
	SA1a(i) Pressure (kPa)	SA1a(i) Bend angle (˚)	SA1a(ii) Pressure (kPa)	SA1a(ii) Bend angle (˚)	SA1a(iii) Pressure (kPa)	SA1a(iii) Bend angle (˚)	Avg SA1a Pressure (kPa)	Avg SA1a Bend angle (˚)	SA2a(i) Pressure (kPa)	SA2a(i) Bend angle (˚)	SA2a(ii) Pressure (kPa)	SA2a(ii) Bend angle (˚)	SA2a(iii) Pressure (kPa)	SA2a(iii) Bend angle (˚)	Avg SA2a Pressure (kPa)	Avg SA2a Bend angle (˚)
	14	0	10	0	8	0	10.6667	0	18	0	19	0	18	0	18.3333	0
	18	10	12	10	13	20	14.3333	13.3333	21	25	23	30	24	35	22.6667	30
	20	25	14	20	16	40	16.6667	28.3333	23	50	26	50	26	60	25	54
	22	45	20	50	18	65	20	53.3333	26	85	28	65	27	70	27	74
	24	55	21	60	20	75	21.6667	63.3333	27	95	30	80	30	90	29	89
	27	120	23	80	24	95	24.6667	98.3333	29	110	36	110	35	120	33.3333	114
	29	140	25	90	28	135	27.3333	121.667	33	130	40	130	37	130	36.6667	130
	30	160	30	140	30	160	30	153.333	35	150	43	150	40	150	39.3333	150
	32	170	32	160	32	170	32	166.667	42	180	47	180	45	180	44.6667	180

## Sheet: BA - SA3 - Graphs
	Average Pressure (Kpa) SA3
									3								3								3
	SA3a(i) Pressure (kPa)	SA3a(i) Bend angle (˚)	SA3a(ii) Pressure (kPa)	SA3a(ii) Bend angle (˚)	SA3a(iii) Pressure (kPa)	SA3a(iii) Bend angle (˚)	Avg SA3a Pressure (kPa)	Avg SA3a Bend angle (˚)	SA3b(i) Pressure (kPa)	SA3b(i) Bend angle (˚)	SA3b(ii) Pressure (kPa)	SA3b(ii) Bend angle (˚)	SA3b(iii) Pressure (kPa)	SA3b(iii) Bend angle (˚)	Avg SA3b Pressure (kPa)	Avg SA3b Bend angle (˚)
	19	0	19	0	19	0	19	0	18	0	17	0	18	0	18	0
	23	20	20	10	20	10	21	14	20	15	20	30	20	15	20	20
	25	50	22	35	23	40	24	42	22	30	22	50	22	30	22	37
	26	65	24	60	24	60	25	62	24	45	25	65	24	50	25	54
	28	90	26	80	27	90	27	87	26	60	27	80	26	75	27	72
	34	110	29	105	32	110	32	109	28	85	30	100	28	90	29	92
	37	130	34	130	37	140	36	134	32	120	34	120	32	110	33	117
	40	140	40	150	40	150	40	147	34	135	37	130	38	130	37	132
	45	150	43	160	42	160	44	157	38	150	42	150	42	150	41	150
	47	170	45	170	45	170	46	170	40	160	44	160	44	160	43	160
	49	180	47	180	47	180	48	180	44	180	47	180	47	180	46	180

## Sheet: BA - SA4- Graphs
	Pressure (Kpa) SA4
	SA4a(i) Pressure (kPa)	SA4a(i) Bend angle (˚)	SA4a(ii) Pressure (kPa)	SA4a(ii) Bend angle (˚)	SA4a(iii) Pressure (kPa)	SA4a(iii) Bend angle (˚)	Avg SA4a Pressure (kPa)	Avg SA4a Bend angle (˚)	SA4b(i) Pressure (kPa)	SA4b(i) Bend angle (˚)	SA4b(ii) Pressure (kPa)	SA4b(ii) Bend angle (˚)	SA4b(iii) Pressure (kPa)	SA4b(iii) Bend angle (˚)	Avg SA4b Pressure (kPa)	Avg SA4b Bend angle (˚)
	22	0	20	0	20	0	20.6667	0	19	0	19	0	19	0	19	0
	25	15	21	10	23	13	23	12.6667	21	10	23	20	24	20	22.6667	16.6667
	28	30	22	25	24	20	24.6667	25	23	30	25	35	26	45	24.6667	36.6667
	32	60	26	45	26	30	28	45	26	45	28	60	28	65	27.3333	56.6667
	36	80	30	70	30	60	32	70	28	60	31	80	30	75	29.6667	71.6667
	39	90	35	90	34	80	36	86.6667	34	90	33	90	34	90	33.6667	90
	40	105	42	105	40	100	40.6667	103.333	40	100	38	110	41	110	39.6667	106.667
	45	120	46	120	45	110	45.3333	116.667	45	120	43	130	47	130	45	126.667
	47	130	50	130	50	130	49	130	52	140	48	140	51	140	50.3333	140
	57	160	57	160	57	160	57	160	56	160	56	160	56	160	56	160
*

## Sheet: TipForce Combine
SA1a(i) Pressure (kPa)	SA1a(i) Tip Force (N)	SA1a(ii) Pressure (kPa)	SA1a(ii) Tip Force (N)	SA1a(iii) Pressure (kPa)	SA1a(iii) Tip Force (N)	Avg SA1a Pressure (kPa)	Avg SA1a Tip Force (N)	SA1b(i) Pressure (kPa)	SA1b(i) Tip Force (N)	SA1b(ii) Pressure (kPa)	SA1b(ii) Tip Force (N)	SA1b(iii) Pressure (kPa)	SA1b(iii) Tip Force (N)	Avg SA1b Pressure (kPa)	Avg SA1b Tip Force (N)	SA1c(i) Pressure (kPa)	SA1c(i) Tip Force (N)	SA1c(ii) Pressure (kPa)	SA1c(ii) Tip Force (N)	SA1c(iii) Pressure (kPa)	SA1c(iii) Tip Force (N)	Avg SA1c Pressure (kPa)	Avg SA1c Tip Force (N)	SA1d (i) Pressure (kPa)	SA1d (i) Tip Force (N)	SA1d (ii) Pressure (kPa)	SA1d (ii) Tip Force (N)	SA1d (iii) Pressure (kPa)	SA1d (iii) Tip Force (N)	Avg SA1d Pressure (kPa)	Avg SA1d Tip Force (N)	SA2a(i) Pressure (kPa)	SA2a(i) Tip Force (N)	SA2a(ii) Pressure (kPa)	SA2a(ii) Tip Force (N)	SA2a(iii) Pressure (kPa)	SA2a(iii) Tip Force (N)	Avg SA2a Pressure (kPa)	Avg SA2a Tip Force (N)	SA3a(i) Pressure (kPa)	SA3a(i) Tip Force (N)	SA3a(ii) Pressure (kPa)	SA3a(ii) Tip Force (N)	SA3a(iii) Pressure (kPa)	SA3a(iii) Tip Force (N)	Avg SA3a Pressure (kPa)	Avg SA3a Tip Force (N)	SA3b(i) Pressure (kPa)	SA3b(i) Tip Force (N)
0	0.1674	0	0.19158	0	0.23622	0	0.1984	0	0.22041	0	0.14601	0	0.14601	0	0.17081	0	0.07719	0	0.06975	0	0.10788	0	0.08494	0	0.07719	0	0.05115	0	0.10881	0	0.07905	0	0.08091	0	0.15252	0	0.19065	0	0.14136	0	0.093	0	0.0066	0	0.0099	0	0.0365	0	0.11067
2	0.1674	2	0.18693	2	0.23622	2	0.19685	2	0.22134	2	0.14911	2	0.14911	2	0.173187	2	0.07719	2	0.06975	2	0.10788	2	0.08494	2	0.08928	2	0.05115	2	0.10881	2	0.08308	5	0.089745	5	0.15066	5	0.19344	5	0.144615	5	0.093	5	0.0066	5	0.0099	5	0.0365	5	0.11067
4	0.1674	4	0.18693	4	0.23808	4	0.19747	4	0.22227	4	0.15066	4	0.15066	4	0.17453	4	0.07719	4	0.06975	4	0.10788	4	0.08494	4	0.089838	4	0.05549	4	0.10788	4	0.0844027	10	0.09858	10	0.152985	10	0.198671	10	0.150079	10	0.09207	10	0.0174	10	0.0174	10	0.04229	10	0.21018
6	0.1674	6	0.18693	6	0.23808	6	0.19747	6	0.2232	6	0.15159	6	0.15159	6	0.17546	6	0.08158	6	0.06975	6	0.10974	6	0.0870233	6	0.090954	6	0.06417	6	0.10695	6	0.087358	15	0.20088	15	0.30783	15	0.26877	15	0.25916	15	0.16182	15	0.30318	15	0.29667	15	0.25389	15	0.30969
8	0.19158	8	0.29202	8	0.71796	8	0.40052	8	0.22227	8	0.157635	8	0.157635	8	0.17918	8	0.08598	8	0.07254	8	0.1147	8	0.0910733	8	0.09207	8	0.07471	8	0.10695	8	0.0912433	20	0.63798	20	0.70587	20	0.90768	20	0.75051	20	0.53661	20	0.56172	20	0.75237	20	0.6169	20	0.69471
10	0.26319	10	0.31713	10	0.93558	10	0.5053	10	0.22134	10	0.16368	10	0.16368	10	0.1829	10	0.123132	10	0.13485	10	0.11966	10	0.125881	10	0.09207	10	0.09579	10	0.10416	10	0.09734	25	1.87581	25	1.12809	25	1.581	25	1.5283	25	1.03927	25	1.13832	25	1.14576	25	1.10779	25	1.2927
12	0.27621	12	0.4929	12	1.02393	12	0.59768	12	0.22723	12	0.18135	12	0.18135	12	0.196643	12	0.215016	12	0.15252	12	0.12462	12	0.164052	12	0.09207	12	0.32643	12	0.10416	12	0.17422	30	2.36158	30	1.63959	30	2.02461	30	2.00859	30	1.34943	30	1.58472	30	1.44615	30	1.4601	30	1.56891
14	0.33852	14	0.79422	14	1.09089	14	0.74121	14	0.23312	14	0.19251	14	0.19251	14	0.206047	14	0.3069	14	0.15624	14	0.23715	14	0.23343	14	0.10013	14	0.36828	14	0.28396	14	0.25079	35	2.65453	35	2.16481	35	2.15714	35	2.32549	35	1.61898	35	1.70004	35	1.60053	35	1.63985	35	1.95068
16	0.51522	16	0.88908	16	1.17645	16	0.86025	16	0.23901	16	0.22134	16	0.22134	16	0.22723	16	0.52731	16	0.28365	16	0.3162	16	0.37572	16	0.10819	16	0.46779	16	0.651	16	0.408993	40	2.77977	40	2.55564	40	2.28966	40	2.54169	40	1.92417	40	1.95362	40	1.74003	40	1.87261	40	2.33244
18	0.87141	18	0.9858	18	1.48056	18	1.11259	18	0.32922	18	0.34038	18	0.34038	18	0.33666	18	0.78399	18	0.34689	18	0.52638	18	0.55242	18	0.18693	18	0.60171	18	0.88443	18	0.55769	45	3.02343	45	2.86998	45	2.63686	45	2.84342	45	2.70723	45	2.13482	45	2.37562	45	2.40589	45	2.89974
20	1.08159	20	1.1067	20	1.63494	20	1.27441	20	0.77283	20	0.87699	20	0.87699	20	0.84227	20	0.84909	20	0.55149	20	0.70494	20	0.70184	20	0.3937	20	0.63054	20	1.09926	20	0.707833	50	3.2643	50	3.44127	50	3.30011	50	3.33522	50	3.35637	50	3.14573	50	3.33219	50	3.2781	50	3.40194
22	1.18389	22	1.17273	22	1.80048	22	1.3857	22	0.97743	22	0.99045	22	0.99045	22	0.98611	22	1.02579	22	0.81189	22	0.85281	22	0.89683	22	0.64728	22	0.69099	22	1.33083	22	0.8897
24	1.57449	24	1.5531	24	2.21991	24	1.7825	24	1.26945	24	1.37919	24	1.37919	24	1.34261	24	1.2648	24	1.14762	24	1.06299	24	1.15847	24	0.80073	24	0.98301	24	1.49823	24	1.09399
26	2.17713	26	2.18364	26	2.56494	26	2.30857	26	1.59216	26	1.64424	26	1.64424	26	1.62688	26	1.70097	26	1.49544	26	1.47033	26	1.55558	26	1.08345	26	1.27503	26	2.09529	26	1.48459
28	2.49426	28	2.76117	28	3.17223	28	2.80922	28	1.76049	28	2.19852	28	2.19852	28	2.05251	28	2.11203	28	1.84884	28	1.70841	28	1.88976	28	1.52148	28	1.57542	28	2.24409	28	1.78033
30	3.06807	30	3.08574	30	3.70791	30	3.28724	30	2.13714	30	2.51472	30	2.51472	30	2.38886	30	2.24409	30	2.19759	30	2.14551	30	2.19573	30	1.75584	30	2.09064	30	2.38359	30	2.07669
32	3.33591	32	3.57957	32	3.91995	32	3.61181	32	2.48403	32	2.74536	32	2.74536	32	2.65825	32	2.27199	32	2.40684	32	2.37336	32	2.35073	32	1.98276	32	2.15109	32	2.52588	32	2.21991
34	3.89856	34	3.84555	34	4.1385	34	3.96087	34	2.53704	34	2.87091	34	2.87091	34	2.75962	34	2.5017	34	2.66073	34	2.42033	34	2.52759	34	2.02926	34	2.21154	34	2.73606	34	2.32562
36	4.44633	36	4.2873	36	4.43145	36	4.38836	36	2.60121	36	3.02287	36	3.02287	36	2.88232	36	2.65422	36	3.07458	36	2.46729	36	2.73203	36	2.07297	36	2.40498	36	2.98902	36	2.48899
[truncated: 22 more columns]
